# Supplementary material
Source: PubMed Central journal article supplement (PMC7450241)
Supplement: mmc1.pdf [file mmc1.pdf]

**Awake Prone Positioning for COVID-19 Hypoxemic Respiratory Failure: A Rapid Review**

Online Supplement

## Breakdown of Results Exported

Ovid MEDLINE: (20 + 33) = 53

PubMed: (35 + 15) = 50

## Search Strategy

Database(s): **Ovid MEDLINE(R) and In-Process & Other Non-Indexed Citations and Daily** 1946 to May 18, 2020

Search Strategy:

| #  | Searches                                                                                                                                                                                                                                                                                                                                                                                                                                                                                                                  | Results |
|----|---------------------------------------------------------------------------------------------------------------------------------------------------------------------------------------------------------------------------------------------------------------------------------------------------------------------------------------------------------------------------------------------------------------------------------------------------------------------------------------------------------------------------|---------|
| 1  | exp Coronavirus/ or exp Coronavirus Infections/ or coronaviru*.mp. or "corona virus*".mp. or ncov*.mp. or n-cov*.mp. or "novel cov".mp. or COVID-19.mp. or COVID19.mp. or COVID-2019.mp. or COVID2019.mp. or SARS-CoV-2.mp. or SARSCoV-2.mp. or SARSCoV2.mp. or SARSCoV19.mp. or SARS-Cov-19.mp. or SARSCov-19.mp. or SARSCoV2019.mp. or SARS-Cov-2019.mp. or SARSCov-2019.mp. or "severe acute respiratory syndrome coronaviru*".mp. or "severe acute respiratory syndrome cov 2".mp. or "2019 ncov".mp. or 2019ncov.mp. | 24042   |
| 2  | Patient Positioning/                                                                                                                                                                                                                                                                                                                                                                                                                                                                                                      | 6314    |
| 3  | Prone Position/                                                                                                                                                                                                                                                                                                                                                                                                                                                                                                           | 3986    |
| 4  | prone position*.mp.                                                                                                                                                                                                                                                                                                                                                                                                                                                                                                       | 7542    |
| 5  | (prone adj2 position*).mp.                                                                                                                                                                                                                                                                                                                                                                                                                                                                                                | 7973    |
| 6  | (proned or proning or self-proning).mp.                                                                                                                                                                                                                                                                                                                                                                                                                                                                                   | 79      |
| 7  | 2 or 3 or 4 or 5 or 6                                                                                                                                                                                                                                                                                                                                                                                                                                                                                                     | 13658   |
| 8  | 1 and 7                                                                                                                                                                                                                                                                                                                                                                                                                                                                                                                   | 20      |
| 9  | Respiratory Distress Syndrome, Adult/                                                                                                                                                                                                                                                                                                                                                                                                                                                                                     | 19210   |
| 10 | Severe Acute Respiratory Syndrome/                                                                                                                                                                                                                                                                                                                                                                                                                                                                                        | 4580    |
| 11 | SARS Virus/                                                                                                                                                                                                                                                                                                                                                                                                                                                                                                               | 3035    |
| 12 | Middle East Respiratory Syndrome Coronavirus/                                                                                                                                                                                                                                                                                                                                                                                                                                                                             | 1031    |
| 13 | Influenza A Virus, H1N1 Subtype/                                                                                                                                                                                                                                                                                                                                                                                                                                                                                          | 15132   |
| 14 | exp Pneumonia/                                                                                                                                                                                                                                                                                                                                                                                                                                                                                                            | 93824   |
| 15 | "acute respiratory distress syndrome".mp.                                                                                                                                                                                                                                                                                                                                                                                                                                                                                 | 12916   |
| 16 | "acute respiratory syndrome".mp.                                                                                                                                                                                                                                                                                                                                                                                                                                                                                          | 9387    |
| 17 | (ARDS or SARS or SARS-CoV or MERS or MERS-CoV or H1N1 or pneumonia or influenza).mp.                                                                                                                                                                                                                                                                                                                                                                                                                                      | 275693  |

|    |                                                                                                                                           |        |
|----|-------------------------------------------------------------------------------------------------------------------------------------------|--------|
| 18 | 9 or 10 or 11 or 12 or 13 or 14 or 15 or 16 or 17                                                                                         | 293070 |
| 19 | 7 and 18                                                                                                                                  | 1106   |
| 20 | (non-intubat* or nonintubat* or "not intubat*" or non-ventilat* or nonventilat* or "not ventilat*" or conscious or awake or tubeless).mp. | 78249  |
| 21 | 19 and 20                                                                                                                                 | 33     |

## PubMed

| # | Searches                                                                                                                                                                                                                                                                                                                                                                                                                                                                                                                                                                                                                                                                                             | Results |
|---|------------------------------------------------------------------------------------------------------------------------------------------------------------------------------------------------------------------------------------------------------------------------------------------------------------------------------------------------------------------------------------------------------------------------------------------------------------------------------------------------------------------------------------------------------------------------------------------------------------------------------------------------------------------------------------------------------|---------|
| 1 | "coronavirus"[MeSH Terms] OR "coronavirus infections"[MeSH Terms] OR "coronavirus"[Title/Abstract] OR "corona virus"[Title/Abstract] OR "ncov*" [Title/Abstract] OR "ncov*" [Title/Abstract] OR "novel cov"[Title/Abstract] OR "COVID-19"[Title/Abstract] OR "COVID19"[Title/Abstract] OR "COVID-2019"[Title/Abstract] OR "COVID2019"[Title/Abstract] OR "SARS-COV-2"[Title/Abstract] OR "SARSCOV-2"[Title/Abstract] OR "sarscov2 "[Title/Abstract] OR "SARSCOV19"[Title/Abstract] OR "SARS CoV 19 "[Title/Abstract] OR "severe acute respiratory syndrome cov 2"[Title/Abstract] OR "2019 ncov"[Title/Abstract] OR "2019ncov"[Title/Abstract] OR "severe acute respiratory disease"[Title/Abstract] | 32784   |
| 2 | "prone position"[MeSH Terms] OR "patient positioning"[MeSH Terms] OR "prone position*" [Title/Abstract] OR "proned"[Title/Abstract] OR "proning"[Title/Abstract] OR "self-proning"[Title/Abstract]                                                                                                                                                                                                                                                                                                                                                                                                                                                                                                   | 13756   |
| 3 | 1 and 2                                                                                                                                                                                                                                                                                                                                                                                                                                                                                                                                                                                                                                                                                              | 35      |
| 4 | "respiratory distress syndrome, adult"[MeSH Terms] OR "severe acute respiratory syndrome"[MeSH Terms] OR "SARS virus"[MeSH Terms] OR "middle east respiratory syndrome coronavirus"[MeSH Terms] OR "influenza a virus, h1n1 subtype"[MeSH Terms] OR "pneumonia"[MeSH Terms] OR "acute respiratory distress syndrome"[Title/Abstract] OR "acute respiratory syndrome"[Title/Abstract] OR "ARDS"[Title/Abstract] OR "SARS"[Title/Abstract] OR "SARS-CoV"[Title/Abstract] OR "MERS"[Title/Abstract] OR "MERS-CoV"[Title/Abstract] OR "H1N1"[Title/Abstract] OR "pneumonia"[Title/Abstract] OR "influenza"[Title/Abstract]                                                                               | 287060  |
| 6 | 2 and 4                                                                                                                                                                                                                                                                                                                                                                                                                                                                                                                                                                                                                                                                                              | 1120    |
| 7 | "non-intubate"[Title/Abstract] OR "non-intubated"[Title/Abstract] OR "non-intubation"[Title/Abstract] OR "non-intubating"[Title/Abstract] OR "nonintubate"[Title/Abstract] OR "nonintubated"[Title/Abstract] OR "nonintubating"[Title/Abstract] OR "nonintubation"[Title/Abstract] OR "not-intubated"[Title/Abstract] OR "non-ventilate"[Title/Abstract] OR "non-ventilated"[Title/Abstract] OR "non-ventilating"[Title/Abstract] OR "non-ventilation"[Title/Abstract] OR "nonventilate"[Title/Abstract] OR "nonventilated"[Title/Abstract] OR "nonventilating"[Title/Abstract] OR "nonventilation"[Title/Abstract]                                                                                  | 71524   |

|   |                                                                                                                             |    |
|---|-----------------------------------------------------------------------------------------------------------------------------|----|
|   | OR "not-ventilated"[Title/Abstract] OR "conscious"[Title/Abstract] OR "awake"[Title/Abstract] OR "tubeless"[Title/Abstract] |    |
| 8 | 6 and 7                                                                                                                     | 15 |

### TRIP Pro/Google Scholar

("covid-19" OR coronavirus OR COVID19 OR "corona virus" OR ncov OR "n-cov" OR "covid-2019" OR covid2019 OR "SARS-COV-2" OR "sarscov-2" OR sarscov2 OR sarscov19 OR "sars-cov-19" or "sarscov-19" OR sarscov2019 OR "sars-cov-2019" OR "severe acute respiratory syndrome") AND (prone position or proned or prone positioning or proning or self-proning)

("acute respiratory distress syndrome" or "acute respiratory syndrome" or ARDS or SARS or SARS-CoV or MERS or MERS-CoV or H1N1 or pneumonia or influenza) AND (prone position or proned or prone positioning or proning or self-proning) AND (non-intubat\* or nonintubat\* or nonventilat\* or non-ventilat\* or conscious or awake or tubeless)

(non-intubat\* or nonintubat\* or nonventilat\* or non-ventilat\* or conscious or awake or tubeless) AND (prone position or proned or prone positioning or proning or self-proning)

### LitCovid/ WHO COVID-19 Database/Cochrane Library/Centre for Evidence-Based Medicine (CEBM)/National institute for Health and Care Excellence (NICE)/medRxiv/BMJ Best Practice/Cambridge Coronavirus Free Access Collection

prone or prone position or proned or proning or prone positioning or self-proning
